# Supplementary material
Source: MDPI journal article supplement (https://www.mdpi.com/1424-8247/14/12/1322)
Supplement: s1 [file s1]

Supplemental Data:

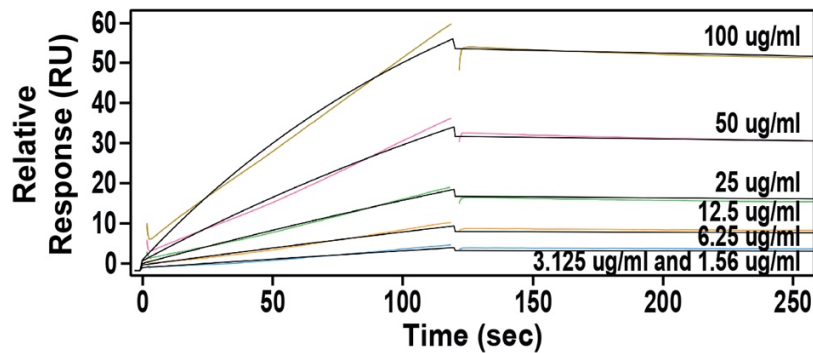

**Supplemental Figure S1.** ALT-100 mAb Surface Plasmon Resonance (SPR). ALT-100 mAb binding affinity was assessed using SPR with immobilization of rhNAMPT (His Tag peptide, MBL International). As seen, the equilibrium dissociation constant ( $K_d$ ) is  $6.33\text{E-}09$  (M) with  $R_{\text{max}}$  (RU) 99.1%.

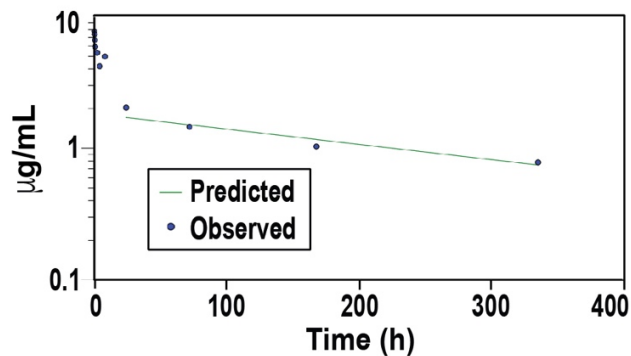

**Supplemental Figure S2.** ALT-100 mAb Pharmacokinetics. Shown are the average plasma concentration of ALT-100 mAb vs. time profiles in rats after a single IV dose at  $100\text{ }\mu\text{g/kg}$ . Green line represents the predicted elimination phase, which was used to determine half-lives. Circles represent the average plasma concentration from six rats at each time point. The  $T_{1/2}$  of ALT-100 mAb is 355.2 hours (14.8 days).
